# Supplementary material
Source: PubMed Central journal article supplement (PMC5656998)
Supplement: NIHMS912712-supplement-sup_fig.pdf [file NIHMS912712-supplement-sup_fig.pdf]

## Supplemental Figure 1

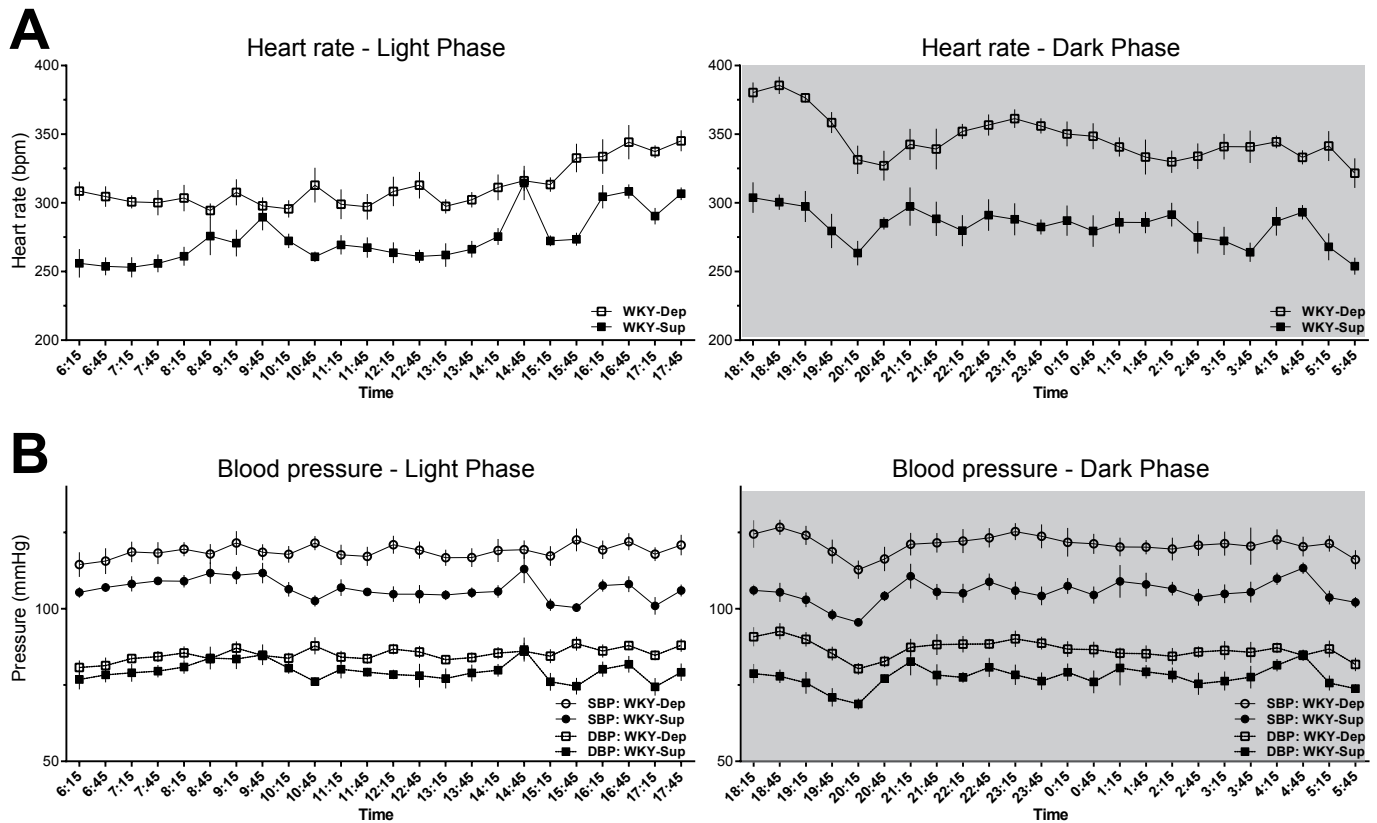

**Supplemental Figure 1.** Dietary methyl donor supplementation decreases WKY rats' baseline heart rate (HR) and blood pressure (BP) across the 24 h period. (A) WKY rats that received the methyl donor supplemented diet (WKY-SUP) displayed significantly lower HR compared to methyl donor depleted (WKY-DEP) rats throughout the light phase (effect of diet:  $F(1, 12) = 80.33$ ,  $p < 0.0001$ ) and dark phase (effect of diet:  $F(1, 12) = 74.46$ ,  $p < 0.0001$ ) of a 24 h period. (B) WKY-SUP rats showed significantly lower systolic BP (SBP) during both the light phase (effect of diet:  $F(1, 12) = 15.55$ ,  $p = 0.002$ ) and dark phase (effect of diet:  $F(1, 12) = 24.14$ ,  $p < 0.001$ ). Likewise, WKY-SUP rats also showed lower diastolic BP during the light phase (effect of diet:  $F(1, 12) = 5.16$ ,  $p < 0.05$ ) and dark phase (effect of diet:  $F(1, 12) = 13.77$ ,  $p < 0.01$ ). Data represent mean  $\pm$  SEM in 30-min increments throughout the light and dark phases of the 24 h assessment period.
